# Supplementary material for: Synergistic anticancer effects of triptolide and celastrol, two main compounds from thunder god vine
Source: PubMed Central journal article supplement (PMC4741730; doi:10.18632/oncotarget.5411), 2015-10-05
Supplement: oncotarget-06-32790-s001.pdf [file oncotarget-06-32790-s001.pdf]

SUPPLEMENTARY FIGURES AND TABLE

A

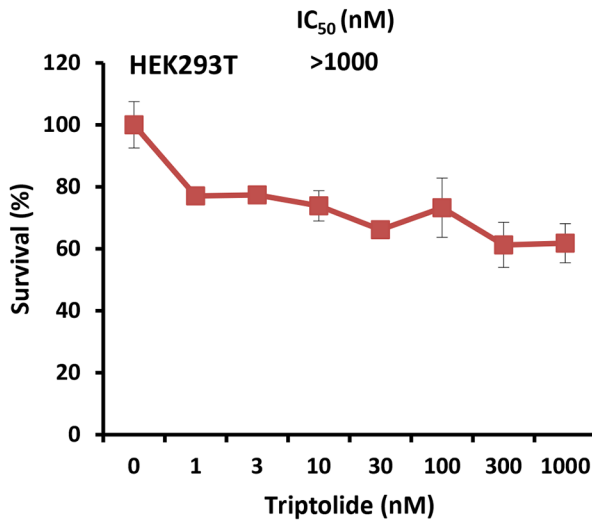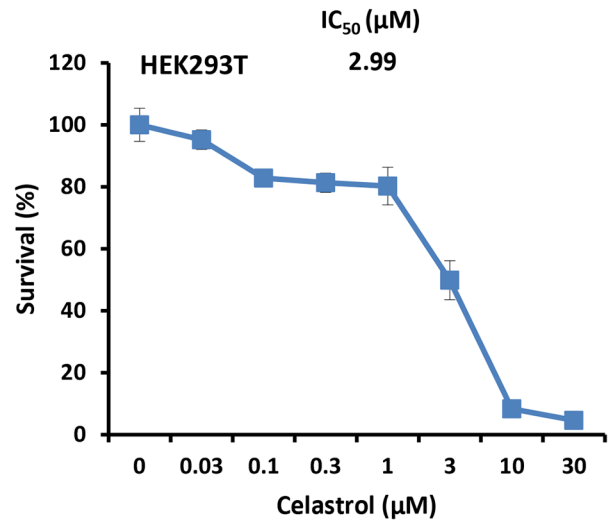

B

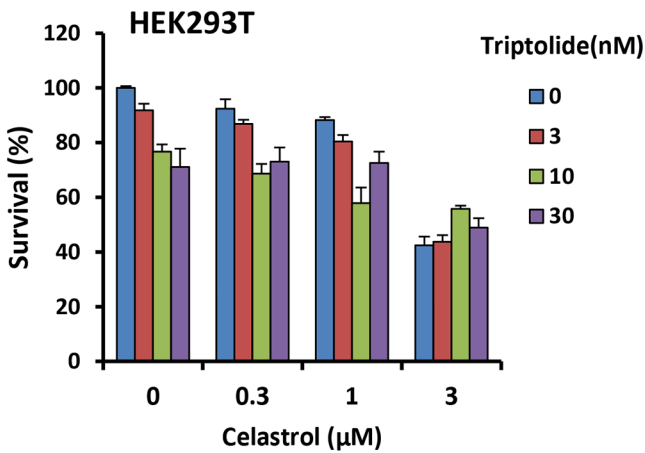

CI Data for Non-Constant Combo: T-C (Trip+Cela)

| Dose Trip | Dose Cela | Effect | CI      |
|-----------|-----------|--------|---------|
| 3.0       | 0.3       | 0.86   | 1.00760 |
| 3.0       | 1.0       | 0.8    | 1.32816 |
| 3.0       | 3.0       | 0.43   | 0.79191 |
| 10.0      | 0.3       | 0.68   | 0.52058 |
| 10.0      | 1.0       | 0.57   | 0.57123 |
| 10.0      | 3.0       | 0.55   | 1.29812 |
| 30.0      | 0.3       | 0.73   | 1.71039 |
| 30.0      | 1.0       | 0.72   | 2.09237 |
| 30.0      | 3.0       | 0.49   | 1.22825 |

Supplementary Figure S1: Effects of alone or co-treatment with triptolide and celastrol on the growth of HEK293T cells *in vitro*. Human normal embryonic kidney cells HEK293T were treated with the indicated concentrations of triptolide and celastrol for 72 h, and cell survival was detected by MTT assay. The summary survival curves A, growth histogram and CI values B, were shown.

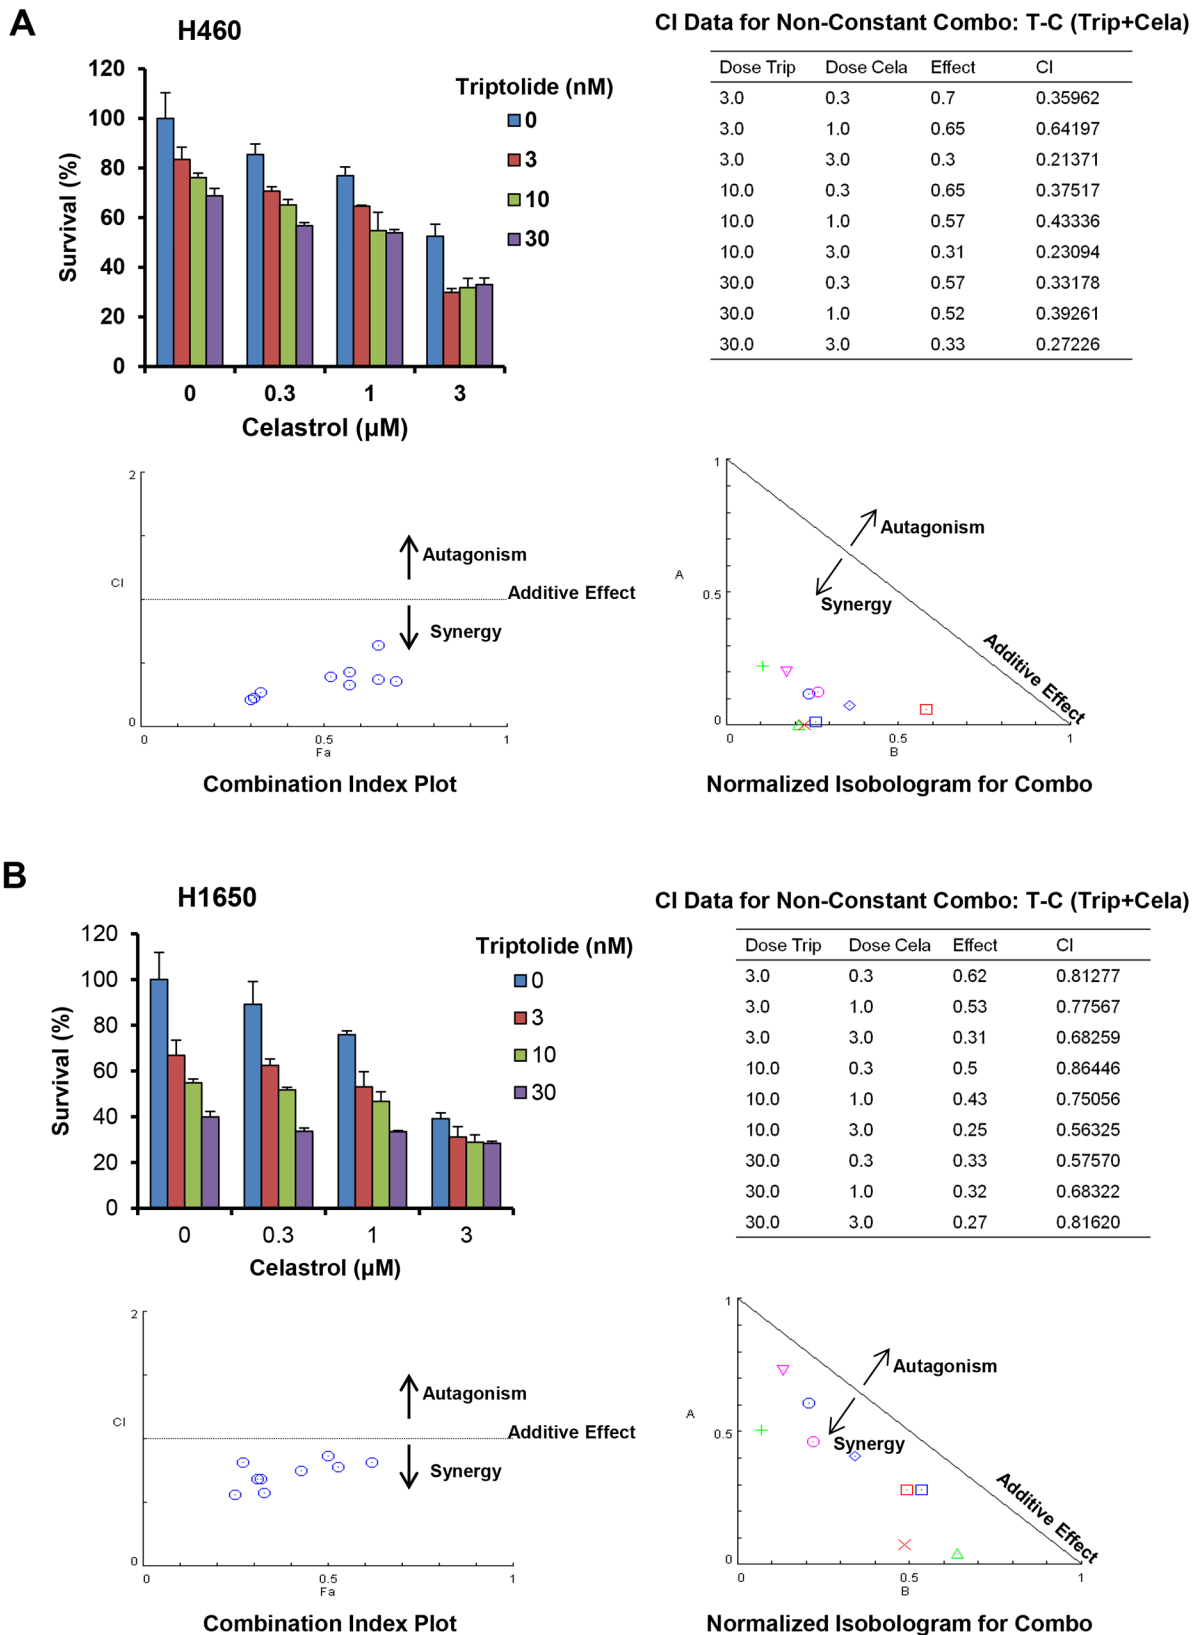

Supplementary Figure S2: Triptolide and celastrol synergistically inhibit the growth of other used cancer cells *in vitro*. H460 A. H1650 B. H1944 (Continued)

**C**

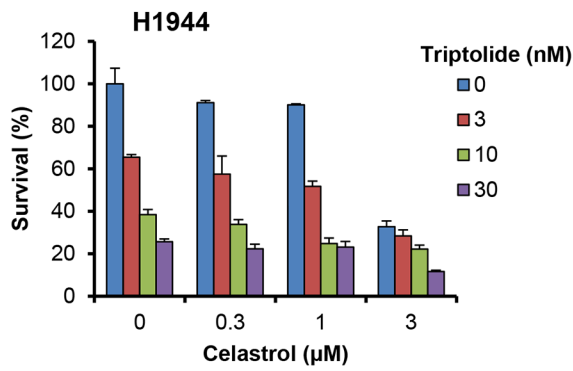

CI Data for Non-Constant Combo: T-C (Trip+Cela)

| Dose Trip | Dose Cela | Effect | CI      |
|-----------|-----------|--------|---------|
| 3.0       | 0.3       | 0.57   | 0.84256 |
| 3.0       | 1.0       | 0.52   | 0.94176 |
| 3.0       | 3.0       | 0.28   | 0.69046 |
| 10.0      | 0.3       | 0.34   | 0.70263 |
| 10.0      | 1.0       | 0.25   | 0.51366 |
| 10.0      | 3.0       | 0.22   | 0.71413 |
| 30.0      | 0.3       | 0.22   | 0.87212 |
| 30.0      | 1.0       | 0.23   | 1.04902 |
| 30.0      | 3.0       | 0.12   | 0.55419 |

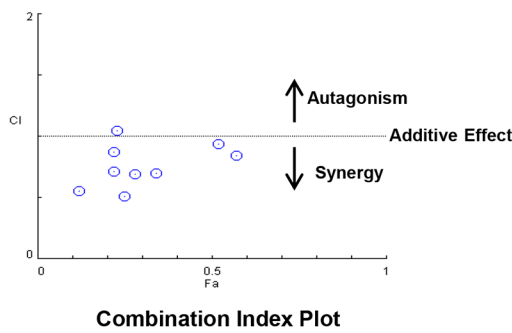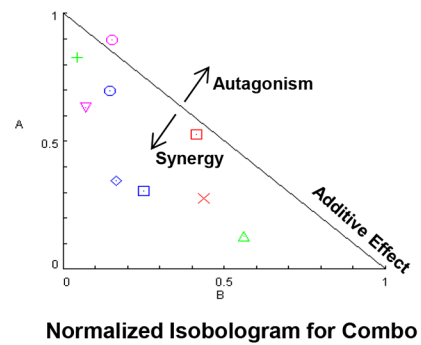

**D**

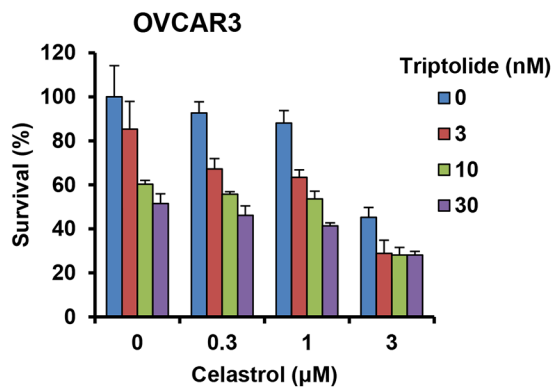

CI Data for Non-Constant Combo: T-C (Trip+Cela)

| Dose Trip | Dose Cela | Effect | CI      |
|-----------|-----------|--------|---------|
| 3.0       | 0.3       | 0.67   | 0.46342 |
| 3.0       | 1.0       | 0.63   | 0.71124 |
| 3.0       | 3.0       | 0.29   | 0.46853 |
| 10.0      | 0.3       | 0.56   | 0.63284 |
| 10.0      | 1.0       | 0.54   | 0.81597 |
| 10.0      | 3.0       | 0.28   | 0.51986 |
| 30.0      | 0.3       | 0.46   | 0.97751 |
| 30.0      | 1.0       | 0.41   | 0.90368 |
| 30.0      | 3.0       | 0.28   | 0.72254 |

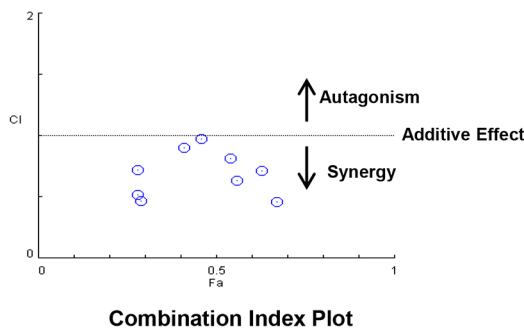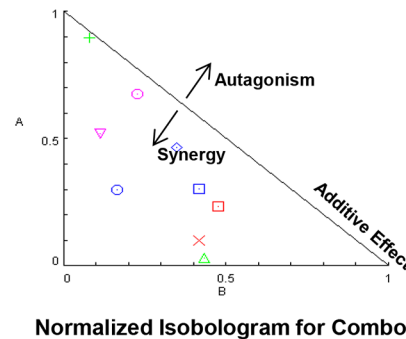

Supplementary Figure S2: (Continued) Triptolide and celastrol synergistically inhibit the growth of other used cancer cells *in vitro*. H460 C. OVCAR3 D. SKOV3 (Continued)

**E**

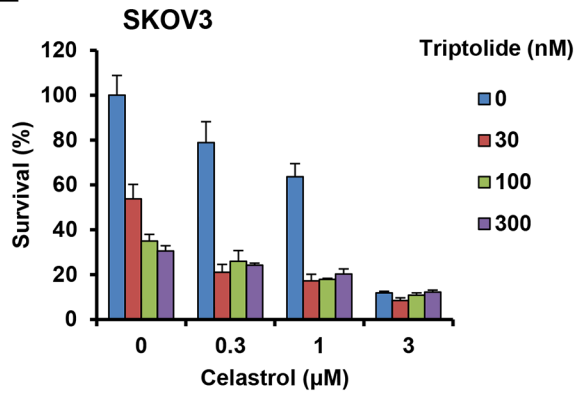

CI Data for Non-Constant Combo: T-C (Trip+Cela)

| Dose Trip | Dose Cela | Effect | CI      |
|-----------|-----------|--------|---------|
| 30.0      | 0.3       | 0.21   | 0.16165 |
| 30.0      | 1.0       | 0.17   | 0.36799 |
| 30.0      | 3.0       | 0.08   | 0.57634 |
| 100.0     | 0.3       | 0.26   | 0.38636 |
| 100.0     | 1.0       | 0.18   | 0.44231 |
| 100.0     | 3.0       | 0.11   | 0.75356 |
| 300.0     | 0.3       | 0.24   | 0.68583 |
| 300.0     | 1.0       | 0.2    | 0.71313 |
| 300.0     | 3.0       | 0.12   | 0.86034 |

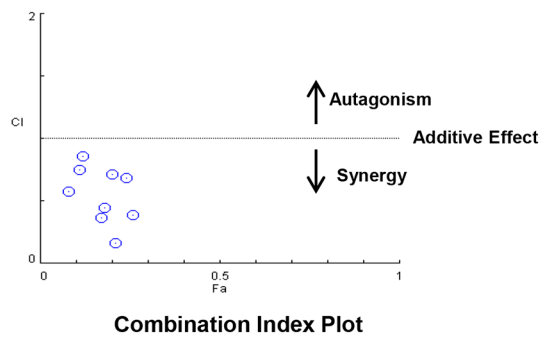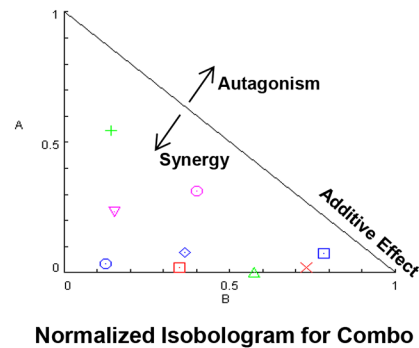

**F**

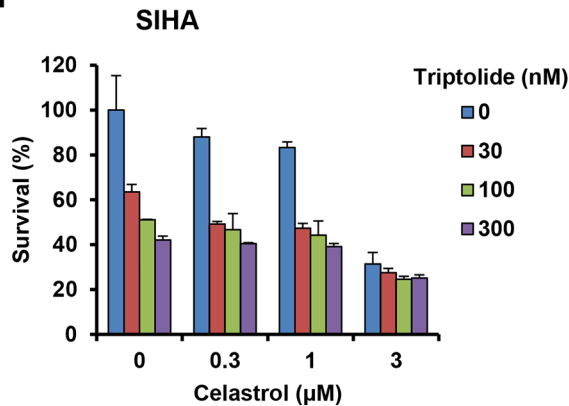

CI Data for Non-Constant Combo: T-C (Trip+Cela)

| Dose Trip | Dose Cela | Effect | CI      |
|-----------|-----------|--------|---------|
| 30.0      | 0.3       | 0.49   | 0.32241 |
| 30.0      | 1.0       | 0.47   | 0.57771 |
| 30.0      | 3.0       | 0.27   | 0.63702 |
| 100.0     | 0.3       | 0.47   | 0.61289 |
| 100.0     | 1.0       | 0.44   | 0.72918 |
| 100.0     | 3.0       | 0.25   | 0.60093 |
| 300.0     | 0.3       | 0.4    | 0.72652 |
| 300.0     | 1.0       | 0.39   | 0.88108 |
| 300.0     | 3.0       | 0.25   | 0.65470 |

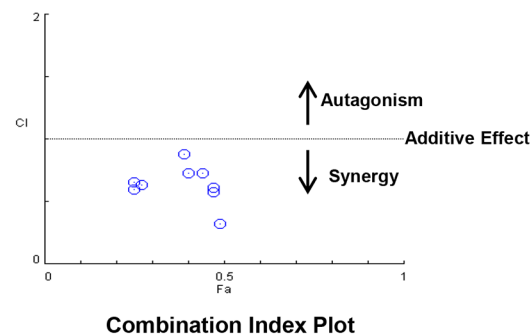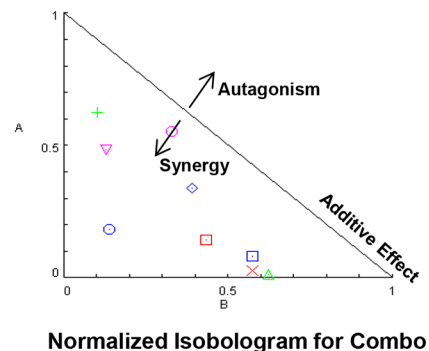

Supplementary Figure S2: (Continued) Triptolide and celastrol synergistically inhibit the growth of other used cancer cells *in vitro*. H460 E. SIHA F. HELA (Continued)

**G**

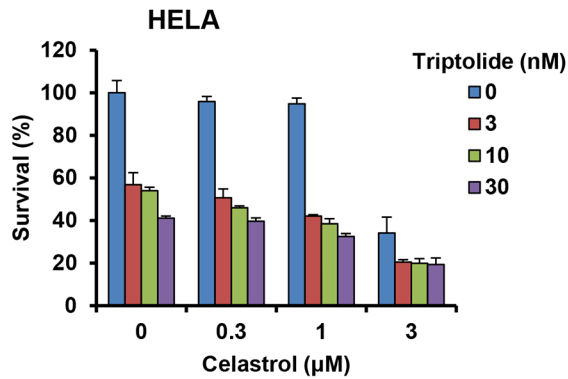

CI Data for Non-Constant Combo: T-C (Tript+Cela)

| Dose Trip | Dose Cela | Effect | CI      |
|-----------|-----------|--------|---------|
| 3.0       | 0.3       | 0.5    | 0.38564 |
| 3.0       | 1.0       | 0.42   | 0.36997 |
| 3.0       | 3.0       | 0.2    | 0.44434 |
| 10.0      | 0.3       | 0.46   | 0.62243 |
| 10.0      | 1.0       | 0.38   | 0.41605 |
| 10.0      | 3.0       | 0.2    | 0.44882 |
| 30.0      | 0.3       | 0.39   | 0.64299 |
| 30.0      | 1.0       | 0.32   | 0.40387 |

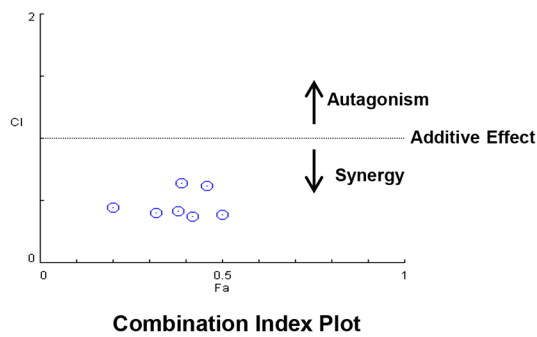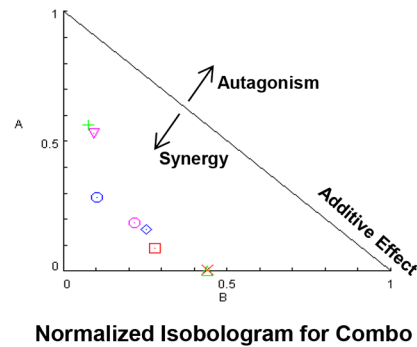

**H**

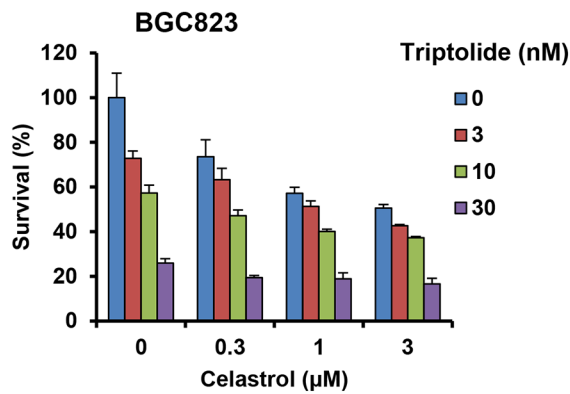

CI Data for Non-Constant Combo: T-C (Tript+Cela)

| Dose Trip | Dose Cela | Effect | CI      |
|-----------|-----------|--------|---------|
| 3.0       | 0.3       | 0.63   | 0.89040 |
| 3.0       | 1.0       | 0.53   | 0.80925 |
| 3.0       | 3.0       | 0.42   | 0.72692 |
| 10.0      | 0.3       | 0.43   | 0.74762 |
| 10.0      | 1.0       | 0.37   | 0.62868 |
| 10.0      | 3.0       | 0.37   | 0.84797 |
| 30.0      | 0.3       | 0.19   | 0.55383 |
| 30.0      | 1.0       | 0.19   | 0.56336 |
| 30.0      | 3.0       | 0.17   | 0.50137 |

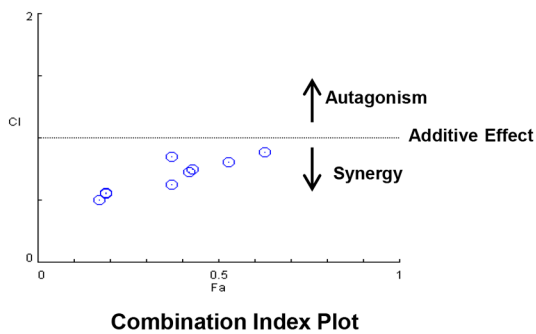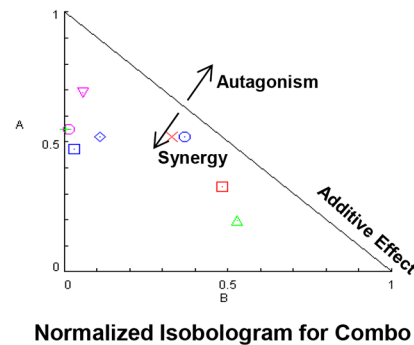

Supplementary Figure S2: (Continued) Triptolide and celastrol synergistically inhibit the growth of other used cancer cells *in vitro*. H460 G. BGC823 H. BEL7402 (Continued)

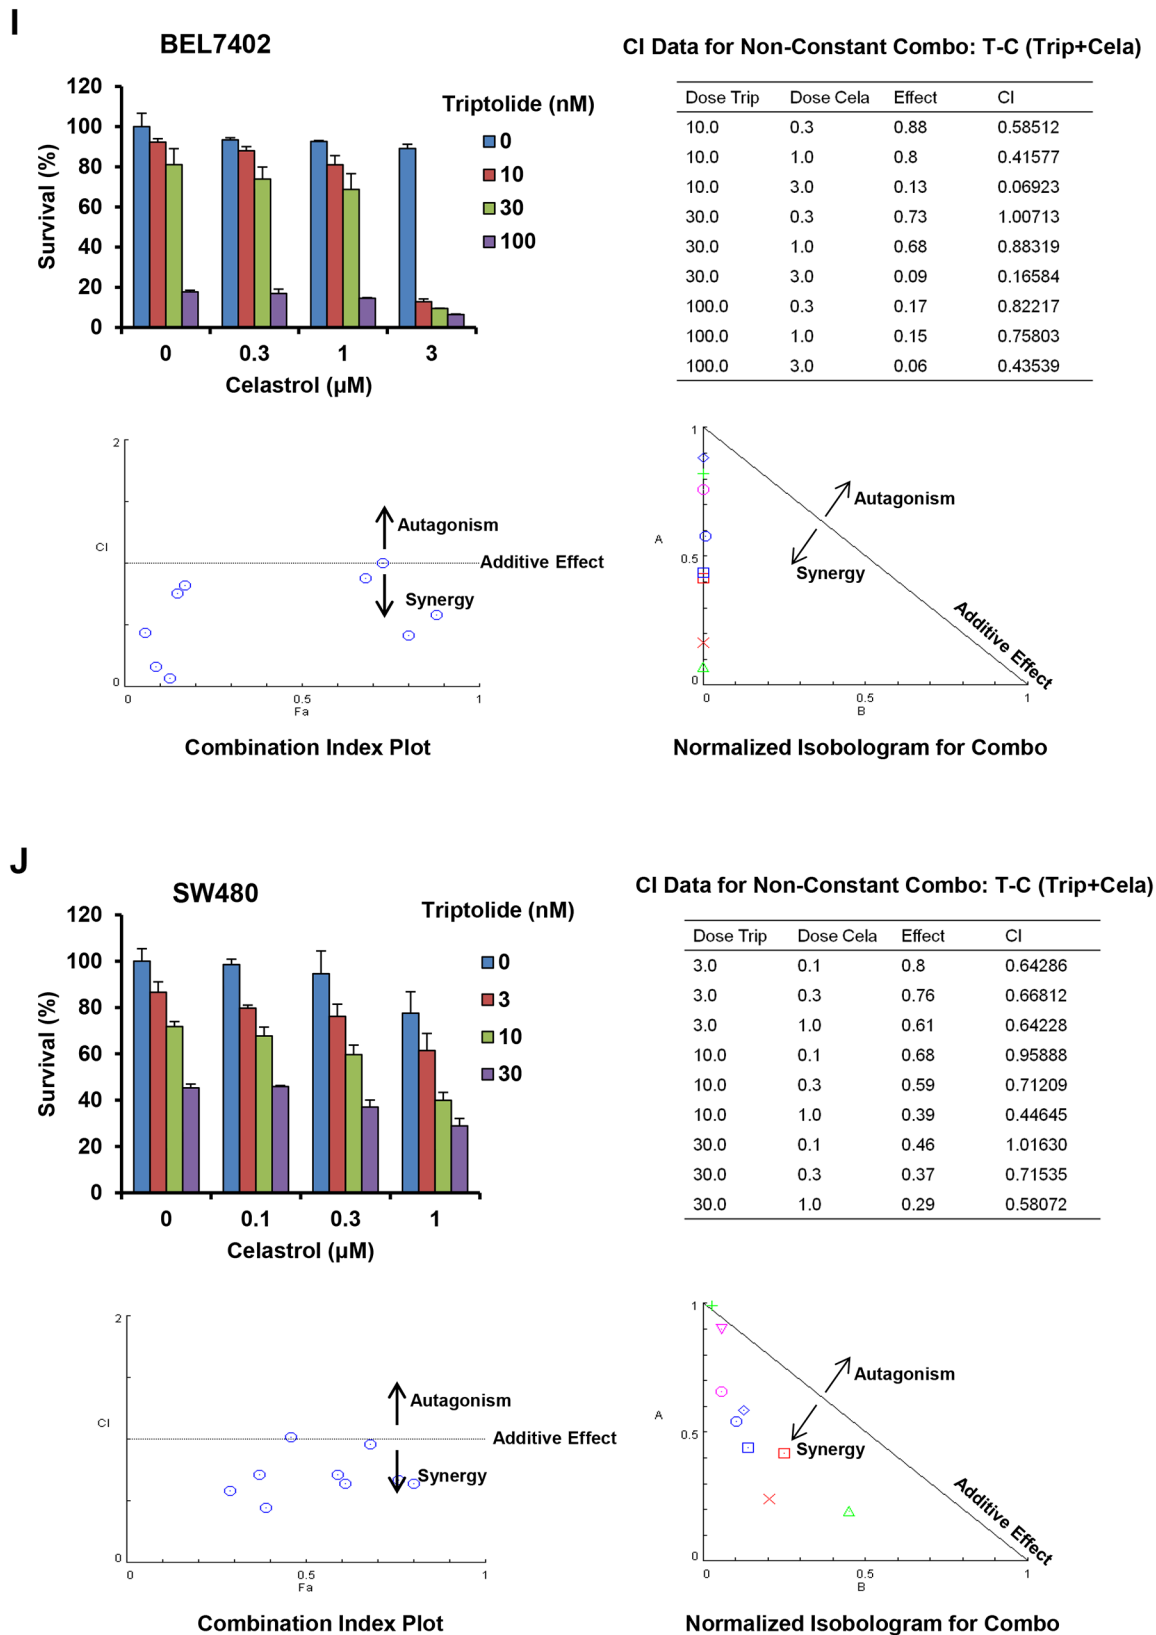

Supplementary Figure S2: (Continued) Triptolide and celestrol synergistically inhibit the growth of other used cancer cells *in vitro*. H460 H. BEL7402 I. and SW480 J. cells were treated with the indicated concentrations of triptolide and celestrol for 72 h, and cell survival was detected by MTT assay. The summary growth histogram, dose-effect curve, CI values and normalized isobologram of three independent experiments were shown.

**Supplementary Table S1: The quantified data of Protein expressions**

| Figure 3C | H1299   |      |      |             | H157    |      |      |             |
|-----------|---------|------|------|-------------|---------|------|------|-------------|
|           | Control | Trip | Cela | Trip + Cela | Control | Trip | Cela | Trip + Cela |
| CDK1      | 1.00    | 1.22 | 1.23 | 1.54        | 1.00    | 1.03 | 0.84 | 1.02        |
| CDK2      | 1.00    | 0.89 | 0.79 | 0.49        | 1.00    | 0.48 | 0.50 | 0.24        |
| CDK4      | 1.00    | 0.76 | 0.94 | 0.50        | 1.00    | 0.73 | 0.84 | 0.43        |
| CDK6      | 1.00    | 0.77 | 0.95 | 0.33        | 1.00    | 0.46 | 0.70 | 0.50        |
| Cyclin B  | 1.00    | 1.29 | 1.17 | 1.39        | 1.00    | 1.55 | 0.82 | 0.99        |
| Cyclin D  | 1.00    | 0.61 | 0.69 | 0.18        | 1.00    | 0.70 | 0.38 | 0.16        |
| Cyclin E  | 1.00    | 0.44 | 0.66 | 0.21        | 1.00    | 0.89 | 0.74 | 0.52        |
| p21       | 1.00    | 2.01 | 2.34 | 2.87        | 1.00    | 1.14 | 1.09 | 1.31        |
| p27       | 1.00    | 0.95 | 1.09 | 0.62        | 1.00    | 0.40 | 0.37 | 0.08        |
| Rb        | 1.00    | 0.71 | 1.08 | 0.83        | 1.00    | 0.59 | 0.40 | 0.33        |
| pRb       | 1.00    | 0.59 | 0.82 | 0.37        | 1.00    | 0.81 | 0.77 | 0.50        |

| Figure 4D   | H1299   |      |      |             | H157    |      |      |             |
|-------------|---------|------|------|-------------|---------|------|------|-------------|
|             | Control | Trip | Cela | Trip + Cela | Control | Trip | Cela | Trip + Cela |
| PARP        | 1.00    | 0.71 | 1.15 | 0.70        | 1.00    | 0.95 | 0.70 | 0.33        |
| C-PARP      | 1.00    | 1.85 | 1.71 | 3.09        | 1.00    | 1.17 | 0.56 | 1.20        |
| Caspase-3   | 1.00    | 0.84 | 1.04 | 0.78        | 1.00    | 0.96 | 0.61 | 0.38        |
| C-Caspase-3 | 1.00    | 1.08 | 0.75 | 1.76        | 1.00    | 1.52 | 0.99 | 1.48        |
| Bcl-2       | 1.00    | 0.69 | 1.02 | 0.29        | 1.00    | 1.42 | 0.89 | 0.42        |
| Bcl-XS/L    | 1.00    | 0.93 | 0.90 | 0.70        | 1.00    | 1.09 | 0.69 | 0.57        |
| Bax         | 1.00    | 0.91 | 0.97 | 0.44        | 1.00    | 0.57 | 0.42 | 0.26        |
| Mcl-1       | 1.00    | 0.32 | 0.65 | 0.15        | 1.00    | 0.53 | 1.29 | 0.60        |
| XIAP        | 1.00    | 0.38 | 1.24 | 0.03        | 1.00    | 0.34 | 0.80 | 0.35        |
| Survivin    | 1.00    | 0.44 | 0.48 | 0.29        | 1.00    | 0.77 | 0.80 | 0.56        |

| Figure 6C  | H1299   |      |      |             | H157    |      |      |             |
|------------|---------|------|------|-------------|---------|------|------|-------------|
|            | Control | Trip | Cela | Trip + Cela | Control | Trip | Cela | Trip + Cela |
| HSP90      | 1.00    | 0.40 | 0.73 | 0.21        | 1.00    | 0.44 | 1.09 | 0.30        |
| HSP70      | 1.00    | 0.80 | 1.25 | 0.45        | 1.00    | 0.46 | 1.55 | 0.30        |
| HSP27      | 1.00    | 0.71 | 1.21 | 0.48        | 1.00    | 0.50 | 2.00 | 0.51        |
| AHA1       | 1.00    | 0.44 | 0.66 | 0.27        | 1.00    | 0.75 | 1.06 | 0.32        |
| AKT        | 1.00    | 0.67 | 0.61 | 0.41        | 1.00    | 0.74 | 0.99 | 0.41        |
| CDC37      | 1.00    | 0.49 | 0.62 | 0.15        | 1.00    | 1.08 | 0.98 | 0.38        |
| EGFR       | 1.00    | 0.57 | 0.85 | 0.29        | 1.00    | 0.54 | 0.85 | 0.37        |
| E-Cadherin | 1.00    | 0.73 | 0.67 | 0.51        | 1.00    | 1.09 | 1.39 | 0.51        |
| MDM2       | 1.00    | 0.49 | 0.79 | 0.31        | 1.00    | 0.63 | 0.96 | 0.40        |

(Continued)

| Figure 6C        | H1299   |      |      |             | H157    |      |      |             |
|------------------|---------|------|------|-------------|---------|------|------|-------------|
|                  | Control | Trip | Cela | Trip + Cela | Control | Trip | Cela | Trip + Cela |
| p65              | 1.00    | 0.66 | 0.93 | 0.25        | 1.00    | 0.31 | 0.80 | 0.26        |
| RAF1             | 1.00    | 0.75 | 0.86 | 0.42        | 1.00    | 0.70 | 0.92 | 0.37        |
| $\beta$ -Catenin | 1.00    | 0.54 | 0.69 | 0.53        | 1.00    | 0.92 | 1.36 | 0.43        |

The quantified data of protein expressions. The Western blot results of Figure 3C, 4D and 6C were quantified by Image J software. The protein levels in other groups were normalized to control group which was defined as 1.00.
